# Supplementary material for: Identification of diagnostic genes and vital microRNAs involved in rheumatoid arthritis: based on data mining and experimental verification
Source: PeerJ. 2021 May 14;9:e11427. doi: 10.7717/peerj.11427 (PMC8127958; doi:10.7717/peerj.11427)
Supplement: Supplemental Information 6 [file peerj-09-11427-s006.xls]

## Sheet: Results
Well	Sample Name	Target Name	Cт
A7	Sample 1	miR-34a-5p	22.7454
A8	Sample 1	miR-34a-5p	22.2033
A9	Sample 1	miR-34a-5p	22.548
B7	Sample 2	miR-34a-5p	22.8252
B8	Sample 2	miR-34a-5p	22.9597
B9	Sample 2	miR-34a-5p	22.4468
C7	Sample 3	miR-34a-5p	22.9339
C8	Sample 3	miR-34a-5p	22.4484
C9	Sample 3	miR-34a-5p	22.9839
D7	Sample 4	miR-34a-5p	25.8116
D8	Sample 4	miR-34a-5p	25.5515
D9	Sample 4	miR-34a-5p	24.8153
E7	Sample 5	miR-34a-5p	25.7888
E8	Sample 5	miR-34a-5p	25.5217
E9	Sample 5	miR-34a-5p	24.5199
F7	Sample 6	miR-34a-5p	25.557
F8	Sample 6	miR-34a-5p	25.4864
F9	Sample 6	miR-34a-5p	24.7089
G7	Sample 7	miR-34a-5p	25.5551
G8	Sample 7	miR-34a-5p	24.6378
G9	Sample 7	miR-34a-5p	24.5395
H7	Sample 8	miR-34a-5p	24.34
H8	Sample 8	miR-34a-5p	24.3471
H9	Sample 8	miR-34a-5p	23.7991
A4	Sample 1	U6	11.442
A5	Sample 1	U6	11.1189
A6	Sample 1	U6	10.6951
B4	Sample 2	U6	11.3361
B5	Sample 2	U6	11.268
B6	Sample 2	U6	11.3475
C4	Sample 3	U6	11.5292
C5	Sample 3	U6	11.2276
C6	Sample 3	U6	11.2889
D4	Sample 4	U6	11.3221
D5	Sample 4	U6	11.286
D6	Sample 4	U6	10.946
E4	Sample 5	U6	11.4733
E5	Sample 5	U6	11.3559
E6	Sample 5	U6	11.4237
F4	Sample 6	U6	11.3744
F5	Sample 6	U6	10.9383
F6	Sample 6	U6	11.2072
G4	Sample 7	U6	11.111
G5	Sample 7	U6	11.0184
G6	Sample 7	U6	11.0882
H4	Sample 8	U6	10.919
H5	Sample 8	U6	10.964
H6	Sample 8	U6	10.6654
